# Supplementary material for: Electronic transport properties of sandwich-type phthalocyanine Th(Pc)2
Source: Royal Society of Chemistry journal article supplement (doi:10.1039/d4tc03268c), 2025-01-01
Supplement: d4tc03268c1.pdf [file d4tc03268c1.pdf]

## Supplementary Material:

### Electronic Transport Properties of Sandwich-Type Phthalocyanine $\text{Th}(\text{Pc})_2$

Weiyu Xie<sup>1,\*</sup>, Xiaobo Yuan<sup>1</sup>, Bo Wang<sup>2</sup>, Ding Wang<sup>1</sup>, Hua Zou<sup>1,\*</sup>

<sup>1</sup>*School of Physics and Optoelectronic Engineering, Hainan University, Haikou, 570228, China.*

<sup>2</sup>*College of Science, Northeast Electric Power University, Jilin, 132012, China.*

Address correspondence to E-mail: wyxie@hainanu.edu.cn; zouhua@hainanu.edu.cn

#### Supplementary Figures:

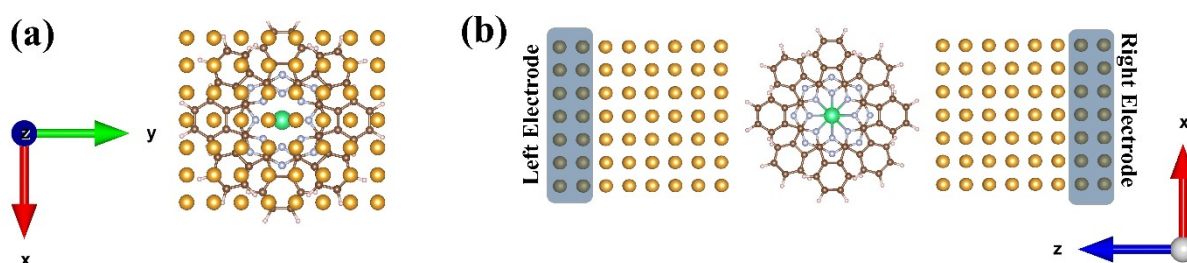

Figure S1. (a) Top View of  $\text{Th}(\text{Pc})_2\text{-TB}$ ; (b) Top view of  $\text{Th}(\text{Pc})_2\text{-LR}$ .

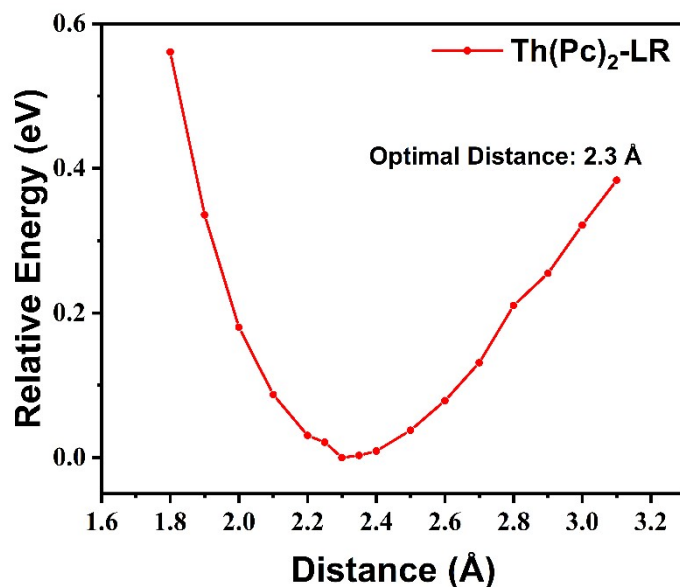

Figure S2. Energy scan of the  $\text{Th}(\text{Pc})_2\text{-LR}$  optimal distance between  $\text{Th}(\text{Pc})_2$  and the Au buffer layer. The dashed lines show the optimal distance point of  $\text{Th}(\text{Pc})_2\text{-LR}$ .

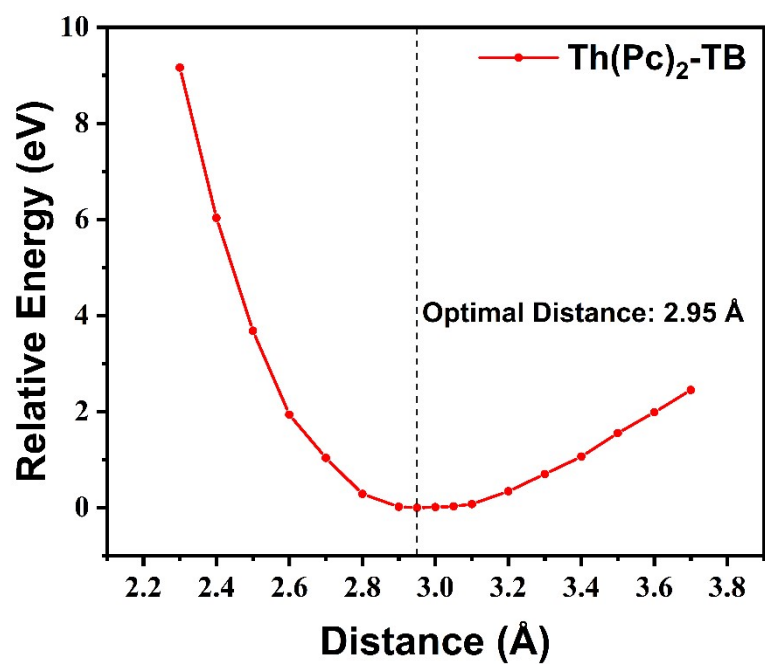

Figure S3. Energy scan of the Th(Pc)<sub>2</sub>-TB optimal distance between Th(Pc)<sub>2</sub> and the Au buffer layer. The dashed lines show the optimal distance point of Th(Pc)<sub>2</sub>-TB.

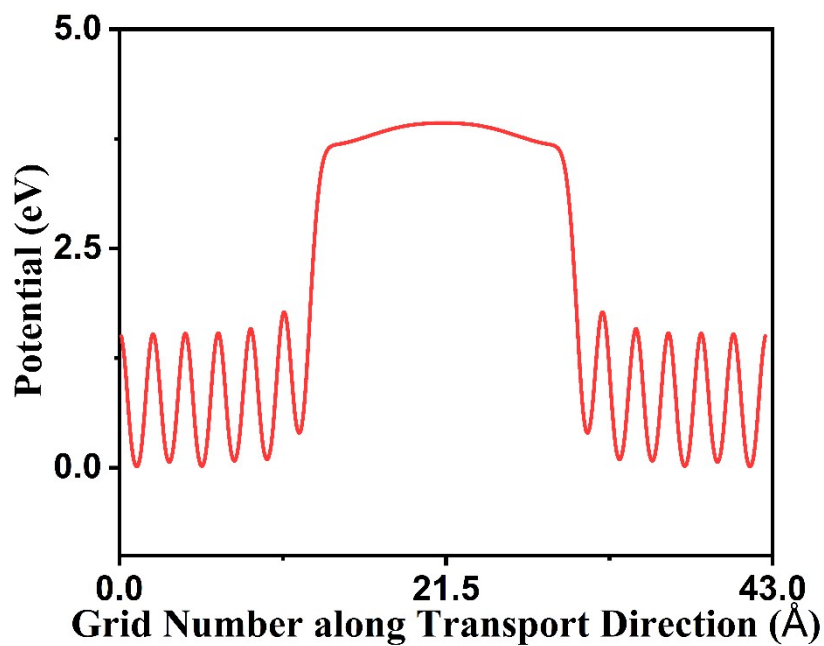

Figure S4. Calculated equilibrium potential distribution function of Th(Pc)<sub>2</sub>-LR.

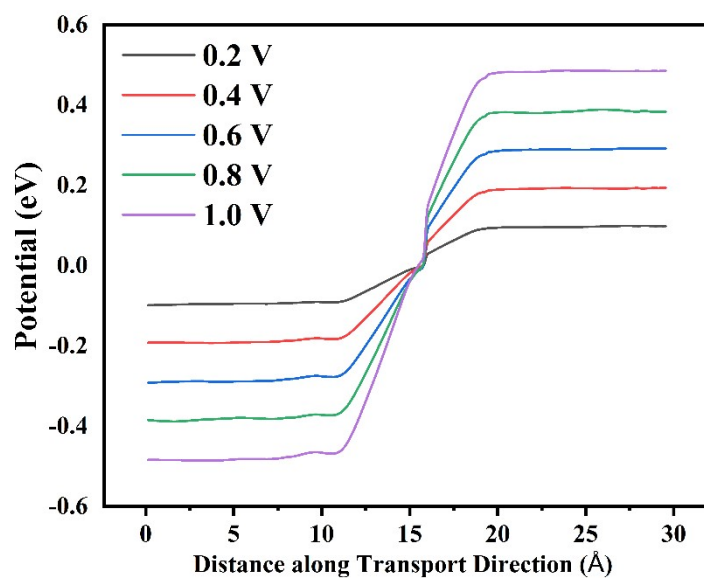

Figure S5. Voltage drop plot of Th(Pc)<sub>2</sub>-TB from 0.2 to 1.0V.

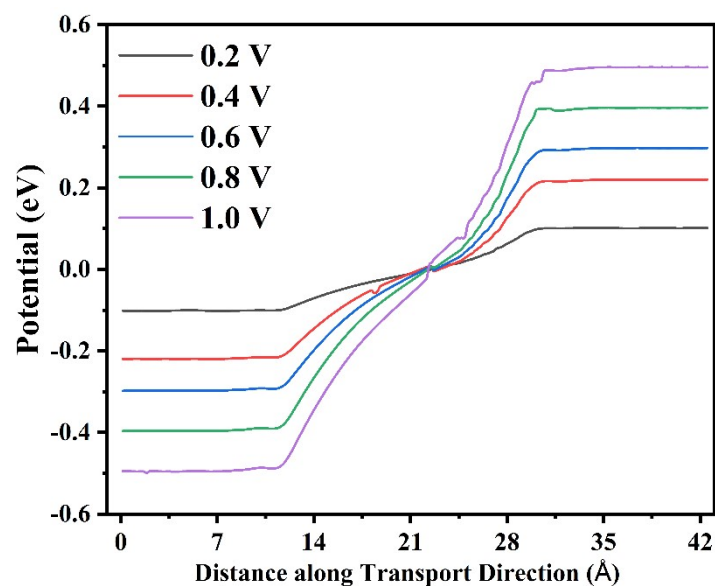

Figure S6. Voltage drop plot of Th(Pc)<sub>2</sub>-LR from 0.2 to 1.0V.

## Supplementary Tables

Table S1. The orbital compositions of Th(Pc)<sub>2</sub> by Hirshfeld method.

| Orbital | C atom <i>p</i> orbital | N atom <i>p</i> orbital | Th atom |
|---------|-------------------------|-------------------------|---------|
| HOMO-39 | 70.047%                 | 12.248%                 | 1.746%  |
| HOMO-38 | 74.102%                 | 7.238%                  | 0.253%  |
| HOMO-37 | 74.097%                 | 7.243%                  | 0.251%  |

|         |         |         |        |
|---------|---------|---------|--------|
| HOMO-36 | 61.530% | 34.367% | 2.027% |
| HOMO-35 | 61.532% | 34.366% | 2.026% |
| HOMO-34 | 23.785% | 65.715% | 9.646% |
| HOMO-33 | 56.863% | 40.544% | 1.407% |
| HOMO-32 | 56.865% | 40.542% | 1.407% |
| HOMO-31 | 26.936% | 63.027% | 9.350% |
| HOMO-30 | 26.937% | 63.027% | 9.350% |
| HOMO-29 | 48.359% | 41.692% | 7.821% |
| HOMO-28 | 48.350% | 41.702% | 7.822% |
| HOMO-27 | 28.659% | 69.191% | 0.775% |
| HOMO-26 | 32.973% | 62.158% | 3.626% |
| HOMO-25 | 92.254% | 3.314%  | 0.202% |
| HOMO-24 | 28.697% | 69.134% | 0.734% |
| HOMO-23 | 28.698% | 69.133% | 0.734% |
| HOMO-22 | 29.002% | 67.785% | 1.973% |
| HOMO-21 | 29.002% | 67.785% | 1.973% |
| HOMO-20 | 93.557% | 2.042%  | 0.075% |
| HOMO-19 | 45.048% | 46.417% | 6.795% |
| HOMO-18 | 39.307% | 57.732% | 0.510% |
| HOMO-17 | 39.445% | 57.602% | 0.511% |
| HOMO-16 | 84.763% | 9.589%  | 0.197% |
| HOMO-15 | 84.764% | 9.589%  | 0.197% |
| HOMO-14 | 47.515% | 49.625% | 1.415% |
| HOMO-13 | 73.960% | 21.266% | 0.154% |
| HOMO-12 | 73.843% | 21.395% | 0.154% |
| HOMO-11 | 89.133% | 5.927%  | 0.379% |
| HOMO-10 | 89.133% | 5.927%  | 0.379% |
| HOMO-9  | 72.535% | 22.169% | 1.635% |
| HOMO-8  | 72.535% | 22.169% | 1.635% |
| HOMO-7  | 57.958% | 36.583% | 3.281% |
| HOMO-6  | 75.907% | 19.878% | 1.221% |
| HOMO-5  | 75.908% | 19.878% | 1.221% |
| HOMO-4  | 73.517% | 22.489% | 1.125% |
| HOMO-3  | 73.517% | 22.491% | 1.123% |
| HOMO-2  | 61.636% | 35.412% | 0.870% |
| HOMO-1  | 86.547% | 9.811%  | 0.649% |
| HOMO    | 87.366% | 10.002% | 0.357% |
| LUMO    | 66.081% | 30.860% | 1.318% |
| LUMO+1  | 66.081% | 30.859% | 1.318% |
| LUMO+2  | 69.177% | 27.268% | 1.771% |
| LUMO+3  | 69.177% | 27.268% | 1.771% |
| LUMO+4  | 74.685% | 19.272% | 1.761% |
| LUMO+5  | 74.658% | 19.260% | 1.807% |
| LUMO+6  | 71.608% | 18.205% | 5.136% |
| LUMO+7  | 71.545% | 18.196% | 5.184% |
| LUMO+8  | 76.298% | 8.041%  | 7.049% |
| LUMO+9  | 82.059% | 7.098%  | 1.991% |
| LUMO+10 | 82.059% | 7.098%  | 1.991% |
| LUMO+11 | 77.815% | 6.651%  | 7.376% |

|         |         |         |         |
|---------|---------|---------|---------|
| LUMO+12 | 80.281% | 7.764%  | 3.902%  |
| LUMO+13 | 80.280% | 7.765%  | 3.903%  |
| LUMO+14 | 16.694% | 13.247% | 69.038% |
| LUMO+15 | 16.668% | 13.246% | 69.070% |
| LUMO+16 | 12.616% | 8.413%  | 78.155% |
| LUMO+17 | 12.612% | 8.413%  | 78.159% |
| LUMO+18 | 88.626% | 2.758%  | 0.244%  |
| LUMO+19 | 49.492% | 5.913%  | 40.203% |
| LUMO+20 | 49.499% | 5.913%  | 40.196% |
| LUMO+21 | 81.599% | 4.710%  | 5.878%  |
| LUMO+22 | 81.603% | 4.711%  | 5.874%  |
| LUMO+23 | 43.470% | 20.267% | 30.413% |
| LUMO+24 | 88.766% | 2.738%  | 0.110%  |
| LUMO+25 | 13.008% | 6.907%  | 79.027% |
| LUMO+26 | 46.954% | 8.223%  | 40.065% |
| LUMO+27 | 46.960% | 8.223%  | 40.058% |
| LUMO+28 | 66.069% | 14.296% | 14.923% |
| LUMO+29 | 66.023% | 14.298% | 14.962% |
| LUMO+30 | 37.944% | 15.038% | 29.104% |

**Table S2.** The coordinates of the ground state in Th(Pc)<sub>2</sub> between different functionals and basis sets.

| Level                   | Nun | A | x (Å)     | y (Å)     | z (Å)    |
|-------------------------|-----|---|-----------|-----------|----------|
| <b>M06-2x/ def-TZVP</b> |     |   | 1.767741  | -0.911833 | 1.469411 |
|                         |     |   | 0.911835  | 1.767741  | 1.469416 |
|                         |     |   | -1.76774  | 0.911833  | 1.469412 |
|                         |     |   | -0.911834 | -1.76774  | 1.469413 |
|                         |     |   | 1.023153  | -3.202912 | 1.615376 |
|                         |     |   | 3.202913  | 1.023153  | 1.615373 |
|                         |     |   | -1.023153 | 3.202911  | 1.61538  |
|                         |     |   | -3.202913 | -1.023153 | 1.615371 |
|                         |     |   | 1.952295  | -2.259978 | 1.594968 |
|                         |     |   | 2.25998   | 1.952295  | 1.594969 |
|                         |     |   | -1.952295 | 2.259978  | 1.59497  |
|                         |     |   | 0.280487  | 2.973119  | 1.59485  |
|                         |     |   | -2.97312  | 0.280487  | 1.594841 |
|                         |     |   | -0.280487 | -2.973119 | 1.594846 |
|                         |     |   | 2.97312   | -0.280487 | 1.594842 |
|                         |     |   | -2.259979 | -1.952295 | 1.594966 |
|                         |     |   | 3.378291  | -2.529463 | 1.739447 |
|                         |     |   | 2.529464  | 3.37829   | 1.739453 |
|                         |     |   | -3.378291 | 2.529463  | 1.739446 |
|                         |     |   | 1.285864  | 4.019551  | 1.73911  |
|                         |     |   | -4.019553 | 1.285863  | 1.739096 |
|                         |     |   | -1.285863 | -4.019551 | 1.739108 |
|                         |     |   | 4.019553  | -1.285863 | 1.739098 |
|                         |     |   | -2.529463 | -3.37829  | 1.739453 |
|                         |     |   | 4.097542  | -3.712059 | 1.848561 |
|                         |     |   | 3.71206   | 4.097541  | 1.848565 |

|           |           |           |
|-----------|-----------|-----------|
| -4.097542 | 3.712059  | 1.848559  |
| 1.185759  | 5.400063  | 1.847569  |
| -5.400065 | 1.185758  | 1.847546  |
| -1.185758 | -5.400063 | 1.847569  |
| 5.400066  | -1.185759 | 1.847549  |
| -3.712059 | -4.097541 | 1.848569  |
| 5.476865  | -3.613237 | 1.948076  |
| 3.613238  | 5.476863  | 1.948087  |
| -5.476865 | 3.613237  | 1.948071  |
| 2.366681  | 6.119613  | 1.947543  |
| -6.119616 | 2.36668   | 1.947518  |
| -2.366679 | -6.119613 | 1.947545  |
| 6.119616  | -2.36668  | 1.947523  |
| -3.613236 | -5.476864 | 1.948091  |
| 3.589445  | -4.667702 | 1.843855  |
| 4.667703  | 3.589444  | 1.843848  |
| -3.589445 | 4.667701  | 1.843852  |
| 0.217488  | 5.883696  | 1.84213   |
| -5.883698 | 0.217487  | 1.842103  |
| -0.217486 | -5.883696 | 1.84213   |
| 5.883698  | -0.217487 | 1.842106  |
| -4.667702 | -3.589444 | 1.843856  |
| 6.073777  | -4.513096 | 2.027164  |
| 4.513097  | 6.073775  | 2.027173  |
| -6.073777 | 4.513096  | 2.027157  |
| 2.331061  | 7.198872  | 2.026365  |
| -7.198875 | 2.33106   | 2.026333  |
| -2.331059 | -7.198872 | 2.026368  |
| 7.198875  | -2.33106  | 2.02634   |
| -4.513095 | -6.073775 | 2.027181  |
| 0.604863  | -1.894466 | -1.468531 |
| 1.894467  | 0.604863  | -1.468532 |
| -0.604864 | 1.894466  | -1.468533 |
| -1.894467 | -0.604863 | -1.468529 |
| -1.541637 | -2.987897 | -1.615337 |
| 2.987898  | -1.541637 | -1.615331 |
| 1.541636  | 2.987896  | -1.615342 |
| -2.987899 | 1.541637  | -1.615329 |
| -0.217974 | -2.978166 | -1.594565 |
| 2.978167  | -0.217974 | -1.59456  |
| 0.217973  | 2.978166  | -1.594569 |
| 2.300683  | 1.903402  | -1.594852 |
| -1.903404 | 2.300684  | -1.594847 |
| -2.300684 | -1.903403 | -1.594848 |
| 1.903403  | -2.300684 | -1.594847 |
| -2.978168 | 0.217974  | -1.594557 |
| 0.599306  | -4.177244 | -1.739494 |
| 4.177246  | 0.599306  | -1.739481 |
| -0.599307 | 4.177243  | -1.739496 |

|                      |           |           |
|----------------------|-----------|-----------|
| 3.751447             | 1.932277  | -1.739962 |
| -1.932278            | 3.751447  | -1.739964 |
| -3.751448            | -1.932277 | -1.739961 |
| 1.932277             | -3.751447 | -1.739965 |
| -4.177247            | -0.599306 | -1.73948  |
| 0.271395             | -5.522023 | -1.848029 |
| 5.522026             | 0.271397  | -1.848004 |
| -0.271396            | 5.522023  | -1.848032 |
| 4.656834             | 2.979087  | -1.849524 |
| -2.979088            | 4.656835  | -1.849525 |
| -4.656835            | -2.979087 | -1.849526 |
| 2.979087             | -4.656834 | -1.849529 |
| -5.522027            | -0.271396 | -1.848005 |
| 1.316524             | -6.427484 | -1.947847 |
| 6.427486             | 1.316527  | -1.947818 |
| -1.316525            | 6.427483  | -1.947846 |
| 6.000565             | 2.652609  | -1.948642 |
| -2.652609            | 6.000565  | -1.948656 |
| -6.000566            | -2.652608 | -1.948647 |
| 2.652607             | -6.000565 | -1.948661 |
| -6.427487            | -1.316526 | -1.947823 |
| -0.763645            | -5.83853  | -1.841834 |
| 5.838534             | -0.763643 | -1.841801 |
| 0.763643             | 5.838529  | -1.841839 |
| 4.314429             | 4.005844  | -1.845035 |
| -4.005845            | 4.314432  | -1.845025 |
| -4.314431            | -4.005844 | -1.845037 |
| 4.005844             | -4.314431 | -1.845032 |
| -5.838534            | 0.763643  | -1.841802 |
| 1.102318             | -7.48593  | -2.026084 |
| 7.485933             | 1.102322  | -2.026046 |
| -1.102319            | 7.48593   | -2.026084 |
| 6.738693             | 3.440781  | -2.027616 |
| -3.440779            | 6.738693  | -2.02763  |
| -6.738694            | -3.44078  | -2.027624 |
| 3.440778             | -6.738693 | -2.027637 |
| -7.485934            | -1.10232  | -2.026053 |
| 0.000000             | 0.000000  | 0.000504  |
| <b>M06-2x/6-31G*</b> |           |           |
| -1.988150            | 0.010941  | -1.468063 |
| 0.010925             | 1.988178  | -1.468000 |
| 1.988149             | -0.010911 | -1.468072 |
| -0.010928            | -1.988166 | -1.468086 |
| -2.397272            | -2.371050 | -1.592184 |
| -2.371031            | 2.397269  | -1.592176 |
| 2.397238             | 2.371065  | -1.592179 |
| 2.371063             | -2.397262 | -1.592182 |
| -2.781147            | -1.099869 | -1.576659 |
| -1.099868            | 2.781141  | -1.576753 |

|           |           |           |
|-----------|-----------|-----------|
| 2.781136  | 1.099896  | -1.576654 |
| 1.130369  | 2.768885  | -1.576750 |
| 2.768891  | -1.130373 | -1.576653 |
| -1.130381 | -2.768888 | -1.576750 |
| -2.768879 | 1.130399  | -1.576648 |
| 1.099875  | -2.781146 | -1.576754 |
| -4.174897 | -0.678348 | -1.684519 |
| -0.678357 | 4.174855  | -1.684926 |
| 4.174887  | 0.678390  | -1.684504 |
| 0.724198  | 4.167147  | -1.684920 |
| 4.167190  | -0.724196 | -1.684498 |
| -0.724219 | -4.167170 | -1.684810 |
| -4.167175 | 0.724234  | -1.684509 |
| 0.678369  | -4.174881 | -1.684817 |
| -5.366020 | -1.395999 | -1.750854 |
| -1.396027 | 5.365927  | -1.751621 |
| 5.365990  | 1.396064  | -1.750819 |
| 1.454919  | 5.350259  | -1.751602 |
| 5.350356  | -1.454899 | -1.750803 |
| -1.454938 | -5.350313 | -1.751368 |
| -5.350312 | 1.454962  | -1.750822 |
| 1.396032  | -5.365989 | -1.751389 |
| -6.548419 | -0.667117 | -1.809486 |
| -0.667174 | 6.548320  | -1.810646 |
| 6.548407  | 0.667217  | -1.809439 |
| 0.739107  | 6.540591  | -1.810635 |
| 6.540697  | -0.739062 | -1.809430 |
| -0.739121 | -6.540652 | -1.810276 |
| -6.540669 | 0.739161  | -1.809468 |
| 0.667165  | -6.548385 | -1.810287 |
| -5.358415 | -2.481115 | -1.741916 |
| -2.481134 | 5.358322  | -1.742678 |
| 5.358360  | 2.481174  | -1.741874 |
| 2.539877  | 5.330723  | -1.742640 |
| 5.330817  | -2.539867 | -1.741840 |
| -2.539905 | -5.330769 | -1.742400 |
| -5.330751 | 2.539921  | -1.741854 |
| 2.481149  | -5.358381 | -1.742441 |
| -7.498959 | -1.189479 | -1.854273 |
| -1.189543 | 7.498840  | -1.855751 |
| 7.498936  | 1.189599  | -1.854209 |
| 1.271891  | 7.485313  | -1.855729 |
| 7.485438  | -1.271842 | -1.854190 |
| -1.271912 | -7.485380 | -1.855265 |
| -7.485398 | 1.271960  | -1.854238 |
| 1.189537  | -7.498913 | -1.855289 |
| -1.413502 | -1.398062 | 1.474429  |
| -1.398059 | 1.413523  | 1.474363  |
| 1.413490  | 1.398090  | 1.474371  |



|           |           |          |
|-----------|-----------|----------|
| 1.398065  | -1.413497 | 1.474437 |
| -0.018516 | -3.371881 | 1.596069 |
| -3.371855 | 0.018538  | 1.596136 |
| 0.018510  | 3.371867  | 1.596055 |
| 3.371857  | -0.018487 | 1.596138 |
| -1.188842 | -2.744408 | 1.581245 |
| -2.744387 | 1.188851  | 1.581280 |
| 1.188822  | 2.744417  | 1.581235 |
| -1.158616 | 2.757302  | 1.581236 |
| 2.757272  | 1.158645  | 1.581281 |
| 1.158630  | -2.757296 | 1.581247 |
| -2.757288 | -1.158614 | 1.581279 |
| 2.744400  | -1.188825 | 1.581281 |
| -2.472662 | -3.432009 | 1.685920 |
| -3.431987 | 2.472660  | 1.686023 |
| 2.472629  | 3.432013  | 1.685982 |
| -2.434795 | 3.458951  | 1.685996 |
| 3.458929  | 2.434826  | 1.686015 |
| 2.434821  | -3.458955 | 1.685915 |
| -3.458963 | -2.434794 | 1.685947 |
| 3.432021  | -2.472634 | 1.685940 |
| -2.807643 | -4.781951 | 1.746294 |
| -4.781916 | 2.807606  | 1.746518 |
| 2.807566  | 4.781942  | 1.746435 |
| -2.754879 | 4.812475  | 1.746460 |
| 4.812457  | 2.754924  | 1.746496 |
| 2.754948  | -4.812495 | 1.746278 |
| -4.812504 | -2.754882 | 1.746342 |
| 4.781967  | -2.807580 | 1.746327 |
| -4.159318 | -5.102813 | 1.799345 |
| -5.102795 | 4.159270  | 1.799635 |
| 4.159225  | 5.102835  | 1.799570 |
| -4.102931 | 5.148198  | 1.799608 |
| 5.148165  | 4.102984  | 1.799599 |
| 4.103017  | -5.148193 | 1.799320 |
| -5.148239 | -4.102937 | 1.799367 |
| 5.102866  | -4.159244 | 1.799343 |
| -2.034880 | -5.543752 | 1.735938 |
| -5.543703 | 2.034837  | 1.736207 |
| 2.034801  | 5.543724  | 1.736084 |
| -1.973794 | 5.565723  | 1.736108 |
| 5.565710  | 1.973833  | 1.736181 |
| 1.973861  | -5.565759 | 1.735917 |
| -5.565742 | -1.973775 | 1.736016 |
| 5.543742  | -2.034796 | 1.736003 |
| -4.462165 | -6.144502 | 1.838905 |
| -6.144479 | 4.462108  | 1.839294 |
| 4.462054  | 6.144523  | 1.839197 |
| -4.394300 | 6.193148  | 1.839246 |

|           |           |          |
|-----------|-----------|----------|
| 6.193114  | 4.394362  | 1.839246 |
| 4.394400  | -6.193146 | 1.838871 |
| -6.193196 | -4.394300 | 1.838943 |
| 6.144560  | -4.462070 | 1.838912 |
| 0.000004  | -0.000043 | 0.003777 |

**B3LYP/def-TZVP**

|           |           |          |
|-----------|-----------|----------|
| 2.001937  | 0.053020  | 1.486655 |
| -0.053064 | 2.001924  | 1.486660 |
| -2.001967 | -0.053077 | 1.486612 |
| 0.053034  | -2.001981 | 1.486585 |
| 2.445652  | -2.319439 | 1.685240 |
| 2.319388  | 2.445638  | 1.685330 |
| -2.445687 | 2.319375  | 1.685278 |
| -2.319423 | -2.445703 | 1.685190 |
| 2.811508  | -1.045488 | 1.650824 |
| 1.045451  | 2.811485  | 1.650888 |
| -2.811542 | 1.045425  | 1.650806 |
| -1.192919 | 2.752173  | 1.650798 |
| -2.752231 | -1.192922 | 1.650699 |
| 1.192885  | -2.752236 | 1.650717 |
| 2.752197  | 1.192859  | 1.650800 |
| -1.045485 | -2.811548 | 1.650759 |
| 4.183581  | -0.592856 | 1.833324 |
| 0.592790  | 4.183562  | 1.833456 |
| -4.183618 | 0.592787  | 1.833261 |
| -0.813576 | 4.146313  | 1.833310 |
| -4.146368 | -0.813605 | 1.833106 |
| 0.813539  | -4.146383 | 1.833167 |
| 4.146331  | 0.813535  | 1.833222 |
| -0.592828 | -4.183632 | 1.833282 |
| 5.383113  | -1.279895 | 1.978238 |
| 1.279839  | 5.383072  | 1.978476 |
| -5.383154 | 1.279820  | 1.978176 |
| -1.563175 | 5.307785  | 1.978074 |
| -5.307865 | -1.563192 | 1.977755 |
| 1.563135  | -5.307860 | 1.977900 |
| 5.307825  | 1.563116  | 1.977923 |
| -1.279880 | -5.383148 | 1.978242 |
| 6.545374  | -0.528915 | 2.110742 |
| 0.528850  | 6.545332  | 2.111035 |
| -6.545418 | 0.528834  | 2.110628 |
| -0.874786 | 6.508160  | 2.110809 |
| -6.508246 | -0.874808 | 2.110393 |
| 0.874743  | -6.508241 | 2.110574 |
| 6.508202  | 0.874728  | 2.110559 |
| -0.528894 | -6.545413 | 2.110770 |
| 5.400178  | -2.361778 | 1.973819 |
| 2.361720  | 5.400142  | 1.974091 |
| -5.400218 | 2.361702  | 1.973797 |

|           |           |           |
|-----------|-----------|-----------|
| -2.644439 | 5.267578  | 1.973338  |
| -5.267652 | -2.644457 | 1.973011  |
| 2.644399  | -5.267653 | 1.973188  |
| 5.267612  | 2.644382  | 1.973219  |
| -2.361761 | -5.400218 | 1.973834  |
| 7.499030  | -1.031935 | 2.214552  |
| 1.031877  | 7.498976  | 2.214924  |
| -7.499075 | 1.031850  | 2.214437  |
| -1.427618 | 7.433845  | 2.214496  |
| -7.433944 | -1.427633 | 2.213994  |
| 1.427573  | -7.433930 | 2.214235  |
| 7.433899  | 1.427548  | 2.214199  |
| -1.031923 | -7.499061 | 2.214610  |
| 1.453186  | -1.377981 | -1.488974 |
| 1.377972  | 1.453249  | -1.488922 |
| -1.453156 | 1.378037  | -1.488951 |
| -1.377942 | -1.453193 | -1.489004 |
| 0.089573  | -3.369458 | -1.686714 |
| 3.369449  | 0.089586  | -1.686538 |
| -0.089539 | 3.369522  | -1.686585 |
| -3.369414 | -0.089522 | -1.686612 |
| 1.249079  | -2.727313 | -1.652361 |
| 2.727340  | 1.249101  | -1.652222 |
| -1.249045 | 2.727375  | -1.652282 |
| 1.102426  | 2.789832  | -1.652178 |
| -2.789764 | 1.102450  | -1.652197 |
| -1.102392 | -2.789769 | -1.652309 |
| 2.789798  | -1.102388 | -1.652181 |
| -2.727307 | -1.249038 | -1.652327 |
| 2.539592  | -3.377410 | -1.833424 |
| 3.377459  | 2.539602  | -1.833260 |
| -2.539555 | 3.377479  | -1.833345 |
| 2.356540  | 3.507616  | -1.833174 |
| -3.507559 | 2.356550  | -1.833203 |
| -2.356502 | -3.507546 | -1.833365 |
| 3.507597  | -2.356481 | -1.833222 |
| -3.377421 | -2.539532 | -1.833434 |
| 2.902385  | -4.711500 | -1.976568 |
| 4.711568  | 2.902366  | -1.976309 |
| -2.902345 | 4.711575  | -1.976445 |
| 2.647773  | 4.859137  | -1.976090 |
| -4.859089 | 2.647754  | -1.976102 |
| -2.647731 | -4.859061 | -1.976346 |
| 4.859129  | -2.647679 | -1.976106 |
| -4.711526 | -2.902290 | -1.976532 |
| 4.255462  | -5.002259 | -2.107140 |
| 5.002358  | 4.255432  | -2.106911 |
| -4.255419 | 5.002339  | -2.107032 |
| 3.983433  | 5.221530  | -2.106781 |

|           |           |           |
|-----------|-----------|-----------|
| -5.221505 | 3.983402  | -2.106840 |
| -3.983388 | -5.221448 | -2.107085 |
| 5.221548  | -3.983322 | -2.106889 |
| -5.002313 | -4.255350 | -2.107199 |
| 2.149625  | -5.488734 | -1.972110 |
| 5.488781  | 2.149585  | -1.971757 |
| -2.149585 | 5.488809  | -1.971941 |
| 1.854698  | 5.595187  | -1.971344 |
| -5.595118 | 1.854660  | -1.971308 |
| -1.854657 | -5.595111 | -1.971612 |
| 5.595158  | -1.854585 | -1.971267 |
| -5.488740 | -2.149509 | -1.971969 |
| 4.574363  | -6.032360 | -2.209407 |
| 6.032470  | 4.574319  | -2.209108 |
| -4.574318 | 6.032444  | -2.209265 |
| 4.247048  | 6.267163  | -2.208871 |
| -6.267143 | 4.247004  | -2.208919 |
| -4.247001 | -6.267077 | -2.209226 |
| 6.267187  | -4.246920 | -2.208958 |
| -6.032423 | -4.574233 | -2.209435 |
| 0.000000  | 0.000000  | -0.001613 |

**B3LYP/6-31G\***

|           |           |           |
|-----------|-----------|-----------|
| -1.998924 | -0.001074 | -1.486296 |
| -0.001072 | 1.998925  | -1.486224 |
| 1.998921  | 0.001079  | -1.486248 |
| 0.001081  | -1.998926 | -1.486250 |
| -2.391435 | -2.394003 | -1.646879 |
| -2.393994 | 2.391431  | -1.646853 |
| 2.391422  | 2.393980  | -1.646805 |
| 2.394009  | -2.391406 | -1.646831 |
| -2.787918 | -1.123387 | -1.619408 |
| -1.123383 | 2.787897  | -1.619481 |
| 2.787905  | 1.123391  | -1.619348 |
| 1.120399  | 2.789092  | -1.619462 |
| 2.789111  | -1.120382 | -1.619359 |
| -1.120387 | -2.789105 | -1.619506 |
| -2.789115 | 1.120396  | -1.619398 |
| 1.123403  | -2.787895 | -1.619487 |
| -4.180556 | -0.707801 | -1.745373 |
| -0.707793 | 4.180519  | -1.745639 |
| 4.180542  | 0.707806  | -1.745294 |
| 0.703326  | 4.181265  | -1.745628 |
| 4.181302  | -0.703297 | -1.745303 |
| -0.703306 | -4.181280 | -1.745673 |
| -4.181306 | 0.703324  | -1.745368 |
| 0.707825  | -4.180518 | -1.745659 |
| -5.370624 | -1.430547 | -1.822379 |
| -1.430529 | 5.370568  | -1.822884 |
| 5.370580  | 1.430568  | -1.822275 |

|           |           |           |
|-----------|-----------|-----------|
| 1.424815  | 5.372065  | -1.822861 |
| 5.372121  | -1.424775 | -1.822295 |
| -1.424769 | -5.372110 | -1.822926 |
| -5.372133 | 1.424812  | -1.822370 |
| 1.430584  | -5.370558 | -1.822893 |
| -6.562324 | -0.708099 | -1.889189 |
| -0.708076 | 6.562250  | -1.889887 |
| 6.562289  | 0.708139  | -1.889077 |
| 0.701117  | 6.562989  | -1.889875 |
| 6.563049  | -0.701059 | -1.889087 |
| -0.701042 | -6.563021 | -1.889929 |
| -6.563069 | 0.701107  | -1.889184 |
| 0.708156  | -6.562255 | -1.889913 |
| -5.356758 | -2.515662 | -1.810882 |
| -2.515639 | 5.356703  | -1.811400 |
| 5.356704  | 2.515673  | -1.810770 |
| 2.509935  | 5.359333  | -1.811356 |
| 5.359415  | -2.509897 | -1.810802 |
| -2.509898 | -5.359401 | -1.811441 |
| -5.359411 | 2.509937  | -1.810862 |
| 2.515693  | -5.356668 | -1.811384 |
| -7.509475 | -1.238529 | -1.938249 |
| -1.238506 | 7.509389  | -1.939102 |
| 7.509433  | 1.238574  | -1.938123 |
| 1.230549  | 7.510686  | -1.939081 |
| 7.510765  | -1.230474 | -1.938139 |
| -1.230462 | -7.510727 | -1.939147 |
| -7.510780 | 1.230533  | -1.938239 |
| 1.238601  | -7.509386 | -1.939118 |
| -1.412716 | -1.414235 | 1.488708  |
| -1.414229 | 1.412721  | 1.488689  |
| 1.412716  | 1.414232  | 1.488655  |
| 1.414236  | -1.412713 | 1.488674  |
| 0.001824  | -3.383906 | 1.647893  |
| -3.383896 | -0.001804 | 1.648003  |
| -0.001799 | 3.383893  | 1.647856  |
| 3.383873  | 0.001819  | 1.647935  |
| -1.177041 | -2.765835 | 1.620915  |
| -2.765814 | 1.177049  | 1.620969  |
| 1.177043  | 2.765822  | 1.620868  |
| -1.179993 | 2.764567  | 1.620889  |
| 2.764546  | 1.179995  | 1.620919  |
| 1.180010  | -2.764558 | 1.620892  |
| -2.764555 | -1.180002 | 1.620979  |
| 2.765819  | -1.177029 | 1.620931  |
| -2.455746 | -3.456748 | 1.745629  |
| -3.456726 | 2.455758  | 1.745654  |
| 2.455754  | 3.456727  | 1.745560  |
| -2.459431 | 3.454114  | 1.745598  |

|           |           |          |
|-----------|-----------|----------|
| 3.454093  | 2.459438  | 1.745592 |
| 2.459461  | -3.454096 | 1.745584 |
| -3.454105 | -2.459444 | 1.745670 |
| 3.456737  | -2.455732 | 1.745613 |
| -2.786295 | -4.809397 | 1.820772 |
| -4.809368 | 2.786313  | 1.820839 |
| 2.786295  | 4.809363  | 1.820693 |
| -2.791397 | 4.806407  | 1.820731 |
| 4.806377  | 2.791395  | 1.820753 |
| 2.791455  | -4.806382 | 1.820725 |
| -4.806401 | -2.791428 | 1.820850 |
| 4.809380  | -2.786248 | 1.820772 |
| -4.139870 | -5.141278 | 1.885702 |
| -5.141240 | 4.139893  | 1.885719 |
| 4.139870  | 5.141239  | 1.885608 |
| -4.145318 | 5.136864  | 1.885667 |
| 5.136835  | 4.145318  | 1.885636 |
| 4.145387  | -5.136808 | 1.885639 |
| -5.136846 | -4.145358 | 1.885740 |
| 5.141285  | -4.139818 | 1.885659 |
| -2.009205 | -5.566886 | 1.809122 |
| -5.566867 | 2.009232  | 1.809256 |
| 2.009217  | 5.566856  | 1.809055 |
| -2.015108 | 5.564711  | 1.809075 |
| 5.564684  | 2.015112  | 1.809156 |
| 2.015184  | -5.564709 | 1.809094 |
| -5.564717 | -2.015143 | 1.809257 |
| 5.566856  | -2.009154 | 1.809166 |
| -4.434586 | -6.186143 | 1.933174 |
| -6.186104 | 4.434609  | 1.933224 |
| 4.434592  | 6.186099  | 1.933077 |
| -4.441139 | 6.181415  | 1.933136 |
| 6.181384  | 4.441134  | 1.933129 |
| 4.441225  | -6.181354 | 1.933113 |
| -6.181398 | -4.441176 | 1.933243 |
| 6.186152  | -4.434516 | 1.933148 |
| -0.000031 | -0.000016 | 0.001748 |

**PBE/def-TZVP**

|           |           |          |
|-----------|-----------|----------|
| -0.030420 | -2.010597 | 1.502734 |
| 2.010593  | -0.030420 | 1.502737 |
| 0.030420  | 2.010597  | 1.502733 |
| -2.010593 | 0.030420  | 1.502738 |
| -2.426050 | -2.353729 | 1.793278 |
| 2.353730  | -2.426049 | 1.793278 |
| 2.426050  | 2.353730  | 1.793278 |
| -2.353730 | 2.426050  | 1.793278 |
| -1.162481 | -2.770242 | 1.737294 |
| 2.770243  | -1.162482 | 1.737284 |
| 1.162482  | 2.770243  | 1.737293 |

|           |           |           |
|-----------|-----------|-----------|
| 2.804145  | 1.078143  | 1.737271  |
| -1.078143 | 2.804145  | 1.737281  |
| -2.804144 | -1.078143 | 1.737272  |
| 1.078143  | -2.804144 | 1.737281  |
| -2.770243 | 1.162482  | 1.737285  |
| -0.768901 | -4.143597 | 2.039455  |
| 4.143603  | -0.768901 | 2.039423  |
| 0.768901  | 4.143598  | 2.039455  |
| 4.164958  | 0.643194  | 2.039453  |
| -0.643194 | 4.164953  | 2.039486  |
| -4.164958 | -0.643194 | 2.039453  |
| 0.643195  | -4.164953 | 2.039485  |
| -4.143603 | 0.768901  | 2.039423  |
| -1.507901 | -5.291920 | 2.333629  |
| 5.291930  | -1.507901 | 2.333578  |
| 1.507901  | 5.291920  | 2.333630  |
| 5.335099  | 1.347119  | 2.333669  |
| -1.347119 | 5.335089  | 2.333722  |
| -5.335099 | -1.347119 | 2.333668  |
| 1.347120  | -5.335089 | 2.333719  |
| -5.291930 | 1.507901  | 2.333578  |
| -0.802499 | -6.465404 | 2.608455  |
| 6.465419  | -0.802499 | 2.608386  |
| 0.802499  | 6.465405  | 2.608458  |
| 6.486725  | 0.606545  | 2.608430  |
| -0.606545 | 6.486710  | 2.608503  |
| -6.486725 | -0.606545 | 2.608429  |
| 0.606545  | -6.486710 | 2.608500  |
| -6.465420 | 0.802499  | 2.608385  |
| -2.598529 | -5.263477 | 2.341202  |
| 5.263487  | -2.598529 | 2.341151  |
| 2.598529  | 5.263477  | 2.341203  |
| 5.339652  | 2.438108  | 2.341283  |
| -2.438108 | 5.339641  | 2.341336  |
| -5.339651 | -2.438108 | 2.341282  |
| 2.438108  | -5.339641 | 2.341333  |
| -5.263488 | 2.598529  | 2.341150  |
| -1.349167 | -7.383976 | 2.831158  |
| 7.383995  | -1.349167 | 2.831073  |
| 1.349167  | 7.383976  | 2.831161  |
| 7.421411  | 1.125178  | 2.831141  |
| -1.125178 | 7.421392  | 2.831229  |
| -7.421411 | -1.125178 | 2.831139  |
| 1.125178  | -7.421392 | 2.831226  |
| -7.383996 | 1.349167  | 2.831072  |
| -1.443134 | -1.400436 | -1.503458 |
| 1.400435  | -1.443134 | -1.503457 |
| 1.443134  | 1.400436  | -1.503457 |
| -1.400435 | 1.443134  | -1.503457 |

|           |           |           |
|-----------|-----------|-----------|
| -3.379843 | 0.050757  | -1.794012 |
| -0.050757 | -3.379844 | -1.794011 |
| 3.379843  | -0.050757 | -1.794012 |
| 0.050757  | 3.379844  | -1.794011 |
| -2.780816 | -1.137210 | -1.737932 |
| 1.137210  | -2.780817 | -1.737931 |
| 2.780816  | 1.137210  | -1.737932 |
| 2.745421  | -1.220202 | -1.737915 |
| 1.220202  | 2.745421  | -1.737914 |
| -2.745421 | 1.220202  | -1.737915 |
| -1.220202 | -2.745421 | -1.737914 |
| -1.137210 | 2.780817  | -1.737931 |
| -3.473557 | -2.386806 | -2.039511 |
| 2.386806  | -3.473558 | -2.039511 |
| 3.473557  | 2.386806  | -2.039511 |
| 3.400315  | -2.490026 | -2.039557 |
| 2.490026  | 3.400315  | -2.039556 |
| -3.400315 | 2.490026  | -2.039557 |
| -2.490026 | -3.400315 | -2.039556 |
| -2.386806 | 3.473558  | -2.039511 |
| -4.808236 | -2.676547 | -2.332720 |
| 2.676547  | -4.808236 | -2.332721 |
| 4.808236  | 2.676547  | -2.332722 |
| 4.725678  | -2.819701 | -2.332843 |
| 2.819702  | 4.725678  | -2.332841 |
| -4.725678 | 2.819701  | -2.332843 |
| -2.819702 | -4.725678 | -2.332840 |
| -2.676548 | 4.808237  | -2.332721 |
| -5.139213 | -4.005323 | -2.606553 |
| 4.005322  | -5.139213 | -2.606556 |
| 5.139213  | 4.005322  | -2.606555 |
| 5.016615  | -4.157826 | -2.606613 |
| 4.157827  | 5.016616  | -2.606612 |
| -5.016616 | 4.157826  | -2.606612 |
| -4.157827 | -5.016616 | -2.606609 |
| -4.005323 | 5.139213  | -2.606555 |
| -5.559400 | -1.885330 | -2.340222 |
| 1.885331  | -5.559400 | -2.340223 |
| 5.559400  | 1.885330  | -2.340223 |
| 5.500254  | -2.051389 | -2.340390 |
| 2.051390  | 5.500255  | -2.340388 |
| -5.500254 | 2.051389  | -2.340390 |
| -2.051390 | -5.500255 | -2.340386 |
| -1.885331 | 5.559401  | -2.340222 |
| -6.175403 | -4.268565 | -2.828433 |
| 4.268565  | -6.175402 | -2.828436 |
| 6.175403  | 4.268564  | -2.828436 |
| 6.044430  | -4.452060 | -2.828516 |
| 4.452061  | 6.044430  | -2.828513 |



|                   |           |           |           |
|-------------------|-----------|-----------|-----------|
|                   | -6.044430 | 4.452060  | -2.828514 |
|                   | -4.452061 | -6.044430 | -2.828510 |
|                   | -4.268566 | 6.175403  | -2.828435 |
|                   | -0.000000 | -0.000000 | -0.000939 |
| <b>PBE/6-31G*</b> | -0.000848 | -1.996828 | -1.486532 |
|                   | -1.996825 | 0.000847  | -1.486534 |
|                   | 0.000847  | 1.996837  | -1.486528 |
|                   | 1.996816  | -0.000849 | -1.486547 |
|                   | 2.403478  | -2.405528 | -1.655294 |
|                   | -2.405528 | -2.403508 | -1.655319 |
|                   | -2.403509 | 2.405556  | -1.655347 |
|                   | 2.405543  | 2.403491  | -1.655322 |
|                   | 1.124261  | -2.796118 | -1.623208 |
|                   | -2.796130 | -1.124277 | -1.623176 |
|                   | -1.124265 | 2.796141  | -1.623230 |
|                   | -2.795183 | 1.126645  | -1.623186 |
|                   | 1.126643  | 2.795175  | -1.623223 |
|                   | 2.795159  | -1.126645 | -1.623167 |
|                   | -1.126632 | -2.795171 | -1.623216 |
|                   | 2.796126  | 1.124264  | -1.623176 |
|                   | 0.707256  | -4.191030 | -1.757418 |
|                   | -4.191060 | -0.707274 | -1.757312 |
|                   | -0.707251 | 4.191057  | -1.757468 |
|                   | -4.190466 | 0.710816  | -1.757320 |
|                   | 0.710827  | 4.190445  | -1.757461 |
|                   | 4.190441  | -0.710825 | -1.757271 |
|                   | -0.710802 | -4.190436 | -1.757425 |
|                   | 4.191053  | 0.707246  | -1.757278 |
|                   | 1.431779  | -5.386392 | -1.842157 |
|                   | -5.386456 | -1.431790 | -1.841940 |
|                   | -1.431750 | 5.386453  | -1.842239 |
|                   | -5.385264 | 1.436326  | -1.841957 |
|                   | 1.436363  | 5.385207  | -1.842225 |
|                   | 5.385204  | -1.436360 | -1.841870 |
|                   | -1.436319 | -5.385198 | -1.842172 |
|                   | 5.386452  | 1.431742  | -1.841886 |
|                   | 0.704379  | -6.582613 | -1.915649 |
|                   | -6.582686 | -0.704384 | -1.915309 |
|                   | -0.704320 | 6.582661  | -1.915746 |
|                   | -6.582099 | 0.709910  | -1.915318 |
|                   | 0.709977  | 6.582046  | -1.915739 |
|                   | 6.582052  | -0.709976 | -1.915212 |
|                   | -0.709911 | -6.582024 | -1.915656 |
|                   | 6.582668  | 0.704312  | -1.915221 |
|                   | 2.525535  | -5.373304 | -1.830325 |
|                   | -5.373361 | -2.525553 | -1.830108 |
|                   | -2.525517 | 5.373385  | -1.830414 |
|                   | -5.371260 | 2.530082  | -1.830136 |

|           |           |           |
|-----------|-----------|-----------|
| 2.530115  | 5.371187  | -1.830389 |
| 5.371179  | -2.530106 | -1.830040 |
| -2.530068 | -5.371201 | -1.830350 |
| 5.373380  | 2.525504  | -1.830068 |
| 1.238087  | -7.537169 | -1.970056 |
| -7.537246 | -1.238100 | -1.969622 |
| -1.238017 | 7.537227  | -1.970175 |
| -7.536213 | 1.244423  | -1.969636 |
| 1.244501  | 7.536149  | -1.970162 |
| 7.536157  | -1.244500 | -1.969506 |
| -1.244417 | -7.536134 | -1.970069 |
| 7.537237  | 1.238009  | -1.969520 |
| 1.411398  | -1.412634 | 1.489099  |
| -1.412603 | -1.411439 | 1.489090  |
| -1.411409 | 1.412642  | 1.489087  |
| 1.412603  | 1.411438  | 1.489096  |
| 3.400566  | -0.001453 | 1.656441  |
| -0.001437 | -3.400615 | 1.656403  |
| -3.400595 | 0.001436  | 1.656478  |
| 0.001451  | 3.400645  | 1.656443  |
| 2.772263  | -1.182247 | 1.624773  |
| -1.182233 | -2.772308 | 1.624757  |
| -2.772285 | 1.182253  | 1.624789  |
| -2.773279 | -1.179902 | 1.624786  |
| -1.179889 | 2.773323  | 1.624773  |
| 2.773275  | 1.179887  | 1.624775  |
| 1.179880  | -2.773304 | 1.624755  |
| 1.182247  | 2.772313  | 1.624772  |
| 3.463799  | -2.463593 | 1.757451  |
| -2.463583 | -3.463833 | 1.757463  |
| -3.463828 | 2.463598  | 1.757510  |
| -3.465901 | -2.460665 | 1.757485  |
| -2.460657 | 3.465934  | 1.757498  |
| 3.465909  | 2.460639  | 1.757474  |
| 2.460648  | -3.465909 | 1.757437  |
| 2.463609  | 3.463827  | 1.757473  |
| 4.821476  | -2.796657 | 1.839995  |
| -2.796656 | -4.821512 | 1.840007  |
| -4.821518 | 2.796681  | 1.840092  |
| -4.823865 | -2.792603 | 1.840056  |
| -2.792606 | 4.823901  | 1.840066  |
| 4.823878  | 2.792538  | 1.840030  |
| 2.792577  | -4.823862 | 1.839967  |
| 2.796723  | 4.821502  | 1.840026  |
| 5.153064  | -4.156959 | 1.911220  |
| -4.156957 | -5.153098 | 1.911270  |
| -5.153103 | 4.156986  | 1.911352  |
| -5.156588 | -4.152631 | 1.911296  |
| -4.152634 | 5.156621  | 1.911339  |

|           |           |          |
|-----------|-----------|----------|
| 5.156641  | 4.152553  | 1.911278 |
| 4.152600  | -5.156586 | 1.911206 |
| 4.157038  | 5.153048  | 1.911275 |
| 5.585640  | -2.014021 | 1.828083 |
| -2.014022 | -5.585678 | 1.828067 |
| -5.585686 | 2.014036  | 1.828174 |
| -5.587377 | -2.009321 | 1.828150 |
| -2.009327 | 5.587418  | 1.828133 |
| 5.587366  | 2.009240  | 1.828107 |
| 2.009305  | -5.587372 | 1.828038 |
| 2.014106  | 5.585695  | 1.828103 |
| 6.205498  | -4.454614 | 1.963784 |
| -4.454614 | -6.205533 | 1.963832 |
| -6.205542 | 4.454637  | 1.963940 |
| -6.209274 | -4.449400 | 1.963877 |
| -4.449406 | 6.209308  | 1.963917 |
| 6.209333  | 4.449299  | 1.963848 |
| 4.449374  | -6.209269 | 1.963759 |
| 4.454719  | 6.205478  | 1.963843 |
| -0.000005 | 0.000008  | 0.002002 |

**PBE0/def-TZVP**

|           |           |          |
|-----------|-----------|----------|
| 1.987065  | 0.001594  | 1.478452 |
| -0.001586 | 1.987089  | 1.478398 |
| -1.987063 | -0.001580 | 1.478463 |
| 0.001588  | -1.987077 | 1.478473 |
| 2.375058  | -2.371258 | 1.669393 |
| 2.371265  | 2.375062  | 1.669362 |
| -2.375054 | 2.371271  | 1.669367 |
| -2.371265 | -2.375050 | 1.669398 |
| 2.767402  | -1.110268 | 1.635883 |
| 1.110274  | 2.767408  | 1.635903 |
| -2.767400 | 1.110281  | 1.635872 |
| -1.114693 | 2.765629  | 1.635901 |
| -2.765622 | -1.114689 | 1.635885 |
| 1.114696  | -2.765621 | 1.635942 |
| 2.765623  | 1.114702  | 1.635861 |
| -1.110274 | -2.767400 | 1.635949 |
| 4.147922  | -0.697253 | 1.817168 |
| 0.697262  | 4.147909  | 1.817337 |
| -4.147921 | 0.697269  | 1.817159 |
| -0.703889 | 4.146790  | 1.817330 |
| -4.146802 | -0.703883 | 1.817160 |
| 0.703892  | -4.146785 | 1.817337 |
| 4.146803  | 0.703898  | 1.817149 |
| -0.697260 | -4.147904 | 1.817347 |
| 5.325880  | -1.415300 | 1.962077 |
| 1.415311  | 5.325850  | 1.962379 |
| -5.325879 | 1.415319  | 1.962051 |
| -1.423820 | 5.323583  | 1.962359 |

|           |           |           |
|-----------|-----------|-----------|
| -5.323613 | -1.423812 | 1.962049  |
| 1.423823  | -5.323584 | 1.962325  |
| 5.323612  | 1.423831  | 1.962034  |
| -1.415308 | -5.325851 | 1.962351  |
| 6.502995  | -0.695280 | 2.094683  |
| 0.695292  | 6.502950  | 2.095127  |
| -6.502996 | 0.695301  | 2.094662  |
| -0.705683 | 6.501832  | 2.095116  |
| -6.501877 | -0.705674 | 2.094659  |
| 0.705686  | -6.501836 | 2.095046  |
| 6.501876  | 0.705695  | 2.094660  |
| -0.695289 | -6.502955 | 2.095061  |
| 5.314307  | -2.498778 | 1.957432  |
| 2.498788  | 5.314277  | 1.957730  |
| -5.314306 | 2.498796  | 1.957390  |
| -2.507277 | 5.310280  | 1.957694  |
| -5.310310 | -2.507270 | 1.957385  |
| 2.507280  | -5.310281 | 1.957654  |
| 5.310308  | 2.507288  | 1.957354  |
| -2.498786 | -5.314278 | 1.957701  |
| 7.444892  | -1.222497 | 2.199253  |
| 1.222510  | 7.444835  | 2.199804  |
| -7.444893 | 1.222520  | 2.199220  |
| -1.234407 | 7.442873  | 2.199782  |
| -7.442931 | -1.234398 | 2.199213  |
| 1.234411  | -7.442881 | 2.199681  |
| 7.442930  | 1.234421  | 2.199211  |
| -1.222507 | -7.444843 | 2.199708  |
| 1.406222  | -1.403933 | -1.480809 |
| 1.403943  | 1.406227  | -1.480755 |
| -1.406219 | 1.403949  | -1.480763 |
| -1.403942 | -1.406212 | -1.480818 |
| 0.002725  | -3.356214 | -1.670752 |
| 3.356220  | 0.002732  | -1.670747 |
| -0.002723 | 3.356227  | -1.670707 |
| -3.356218 | -0.002715 | -1.670754 |
| 1.171853  | -2.742035 | -1.637399 |
| 2.742040  | 1.171858  | -1.637379 |
| -1.171850 | 2.742046  | -1.637357 |
| 1.167398  | 2.743941  | -1.637350 |
| -2.743934 | 1.167404  | -1.637381 |
| -1.167398 | -2.743930 | -1.637397 |
| 2.743939  | -1.167391 | -1.637393 |
| -2.742042 | -1.171845 | -1.637405 |
| 2.440235  | -3.426238 | -1.817277 |
| 3.426241  | 2.440238  | -1.817280 |
| -2.440227 | 3.426251  | -1.817264 |
| 2.434660  | 3.430207  | -1.817258 |
| -3.430196 | 2.434669  | -1.817275 |

|           |           |           |
|-----------|-----------|-----------|
| -2.434663 | -3.430196 | -1.817270 |
| 3.430204  | -2.434656 | -1.817271 |
| -3.426245 | -2.440226 | -1.817280 |
| 2.765635  | -4.767057 | -1.960382 |
| 4.767057  | 2.765634  | -1.960421 |
| -2.765623 | 4.767069  | -1.960385 |
| 2.757866  | 4.771554  | -1.960375 |
| -4.771542 | 2.757877  | -1.960403 |
| -2.757875 | -4.771545 | -1.960361 |
| 4.771553  | -2.757864 | -1.960366 |
| -4.767065 | -2.765624 | -1.960381 |
| 4.107272  | -5.090410 | -2.091081 |
| 5.090409  | 4.107269  | -2.091139 |
| -4.107257 | 5.090422  | -2.091115 |
| 4.098970  | 5.097095  | -2.091116 |
| -5.097083 | 4.098982  | -2.091123 |
| -4.098981 | -5.097087 | -2.091063 |
| 5.097098  | -4.098970 | -2.091072 |
| -5.090421 | -4.107261 | -2.091074 |
| 1.991358  | -5.525038 | -1.955739 |
| 5.525036  | 1.991355  | -1.955790 |
| -1.991346 | 5.525049  | -1.955729 |
| 1.982352  | 5.528269  | -1.955708 |
| -5.528256 | 1.982361  | -1.955760 |
| -1.982361 | -5.528261 | -1.955701 |
| 5.528267  | -1.982349 | -1.955707 |
| -5.525044 | -1.991346 | -1.955738 |
| 4.400613  | -6.129352 | -2.194103 |
| 6.129348  | 4.400609  | -2.194190 |
| -4.400595 | 6.129363  | -2.194150 |
| 4.390612  | 6.136514  | -2.194148 |
| -6.136500 | 4.390626  | -2.194164 |
| -4.390627 | -6.136507 | -2.194074 |
| 6.136517  | -4.390614 | -2.194086 |
| -6.129362 | -4.400602 | -2.194094 |
| -0.000005 | -0.000032 | -0.001668 |

**PBE0/6-31G\***

|           |           |           |
|-----------|-----------|-----------|
| 1.986497  | -0.000209 | -1.474472 |
| -0.000183 | -1.986528 | -1.474399 |
| -1.986492 | 0.000164  | -1.474501 |
| 0.000190  | 1.986499  | -1.474579 |
| 2.381669  | 2.381177  | -1.639237 |
| 2.381208  | -2.381663 | -1.639191 |
| -2.381648 | -2.381218 | -1.639198 |
| -2.381216 | 2.381625  | -1.639244 |
| 2.772510  | 1.114487  | -1.611037 |
| 1.114508  | -2.772484 | -1.611219 |
| -2.772501 | -1.114529 | -1.611019 |
| -1.115023 | -2.772274 | -1.611224 |

|           |           |           |
|-----------|-----------|-----------|
| -2.772298 | 1.115010  | -1.611049 |
| 1.115043  | 2.772259  | -1.611291 |
| 2.772294  | -1.115047 | -1.611007 |
| -1.114517 | 2.772469  | -1.611296 |
| 4.160126  | 0.702130  | -1.752150 |
| 0.702158  | -4.160036 | -1.752945 |
| -4.160120 | -0.702184 | -1.752128 |
| -0.702932 | -4.159904 | -1.752947 |
| -4.159993 | 0.702912  | -1.752144 |
| 0.702945  | 4.159905  | -1.752906 |
| 4.159988  | -0.702964 | -1.752133 |
| -0.702157 | 4.160038  | -1.752909 |
| 5.345629  | 1.424086  | -1.849167 |
| 1.424115  | -5.345475 | -1.850624 |
| -5.345618 | -1.424151 | -1.849107 |
| -1.425111 | -5.345207 | -1.850628 |
| -5.345362 | 1.425091  | -1.849140 |
| 1.425125  | 5.345228  | -1.850462 |
| 5.345348  | -1.425155 | -1.849131 |
| -1.424111 | 5.345497  | -1.850468 |
| 6.531273  | 0.702139  | -1.935523 |
| 0.702178  | -6.531063 | -1.937723 |
| -6.531269 | -0.702217 | -1.935463 |
| -0.703396 | -6.530931 | -1.937725 |
| -6.531143 | 0.703368  | -1.935479 |
| 0.703408  | 6.530960  | -1.937440 |
| 6.531133  | -0.703445 | -1.935506 |
| -0.702170 | 6.531093  | -1.937443 |
| 5.332148  | 2.509604  | -1.839115 |
| 2.509628  | -5.331983 | -1.840633 |
| -5.332125 | -2.509667 | -1.839030 |
| -2.510621 | -5.331513 | -1.840639 |
| -5.331676 | 2.510607  | -1.839086 |
| 2.510638  | 5.331534  | -1.840459 |
| 5.331650  | -2.510668 | -1.839054 |
| -2.509627 | 5.332009  | -1.840470 |
| 7.478265  | 1.231188  | -2.001262 |
| 1.231232  | -7.477997 | -2.004102 |
| -7.478257 | -1.231276 | -2.001174 |
| -1.232628 | -7.477765 | -2.004104 |
| -7.478037 | 1.232594  | -2.001200 |
| 1.232640  | 7.477804  | -2.003714 |
| 7.478020  | -1.232683 | -2.001232 |
| -1.231222 | 7.478037  | -2.003720 |
| 1.404854  | 1.404537  | 1.476521  |
| 1.404580  | -1.404842 | 1.476393  |
| -1.404840 | -1.404577 | 1.476413  |
| -1.404583 | 1.404804  | 1.476541  |
| 0.000322  | 3.367872  | 1.640132  |

|           |           |          |
|-----------|-----------|----------|
| 3.367975  | -0.000346 | 1.640165 |
| -0.000314 | -3.367900 | 1.640067 |
| -3.367969 | 0.000291  | 1.640175 |
| 1.172416  | 2.748616  | 1.612389 |
| 2.748646  | -1.172445 | 1.612374 |
| -1.172402 | -2.748637 | 1.612322 |
| 1.171888  | -2.748856 | 1.612317 |
| -2.748864 | -1.171925 | 1.612385 |
| -1.171890 | 2.748840  | 1.612394 |
| 2.748884  | 1.171885  | 1.612404 |
| -2.748659 | 1.172406  | 1.612416 |
| 2.445263  | 3.438265  | 1.752601 |
| 3.438263  | -2.445309 | 1.752650 |
| -2.445231 | -3.438290 | 1.752611 |
| 2.444585  | -3.438749 | 1.752617 |
| -3.438722 | -2.444662 | 1.752647 |
| -2.444607 | 3.438731  | 1.752594 |
| 3.438753  | 2.444625  | 1.752610 |
| -3.438287 | 2.445279  | 1.752609 |
| 2.773091  | 4.787115  | 1.848221 |
| 4.787116  | -2.773216 | 1.848372 |
| -2.773040 | -4.787135 | 1.848291 |
| 2.772137  | -4.787655 | 1.848312 |
| -4.787637 | -2.772314 | 1.848357 |
| -2.772179 | 4.787645  | 1.848199 |
| 4.787679  | 2.772276  | 1.848232 |
| -4.787151 | 2.773189  | 1.848219 |
| 4.122004  | 5.115117  | 1.933224 |
| 5.115006  | -4.122169 | 1.933443 |
| -4.121944 | -5.115145 | 1.933382 |
| 4.120978  | -5.115920 | 1.933415 |
| -5.115784 | -4.121206 | 1.933413 |
| -4.121029 | 5.115905  | 1.933191 |
| 5.115839  | 4.121169  | 1.933229 |
| -5.115054 | 4.122146  | 1.933200 |
| 1.995984  | 5.545142  | 1.838101 |
| 5.545199  | -1.996141 | 1.838283 |
| -1.995928 | -5.545151 | 1.838159 |
| 1.994882  | -5.545523 | 1.838183 |
| -5.545574 | -1.995095 | 1.838270 |
| -1.994927 | 5.545523  | 1.838075 |
| 5.545610  | 1.995052  | 1.838119 |
| -5.545231 | 1.996110  | 1.838108 |
| 4.417550  | 6.158893  | 1.997834 |
| 6.158767  | -4.417770 | 1.998140 |
| -4.417477 | -6.158920 | 1.998046 |
| 4.416313  | -6.159751 | 1.998091 |
| -6.159601 | -4.416610 | 1.998101 |
| -4.416378 | 6.159738  | 1.997789 |

|           |          |          |
|-----------|----------|----------|
| 6.159662  | 4.416569 | 1.997845 |
| -6.158821 | 4.417746 | 1.997806 |
| -0.000013 | 0.000083 | 0.001508 |

---
